# Supplementary material
Source: PubMed Central journal article supplement (PMC4475978)
Supplement: pnas.1424329112.sapp.pdf [file pnas.1424329112.sapp.pdf]

## Supporting Information

### Defining and Identifying Sleeping Beauties in Science

Qing Ke, Emilio Ferrara, Filippo Radicchi, and Alessandro Flammini

*Center for Complex Networks and Systems Research,*

*School of Informatics and Computing,*

*Indiana University, Bloomington, Indiana 47408, USA*

(Dated: March 30, 2015)

## S1. DATASETS

In this work, we use two large datasets, namely the American Physical Society (APS) and the Web of Science (WoS). APS contains 463,348 papers published from 1893 to 2009 in APS journals and is publicly available upon request at <http://journals.aps.org/datasets>; WoS is comprised of 35,174,034 papers published between 1900 and 2011 in journals covering most research fields, and is available upon purchase from Thomson Reuters. Most papers in the APS dataset are also in the WoS. The APS dataset, though, contains fewer citations: only those originating from papers within the APS journals are therein recorded. Our analysis is based on papers that received at least one citation. A total number of 384,649 and 22,379,244 such papers were found in the APS and WoS dataset, respectively. Fig. S1 shows the yearly number of papers with at least one citation received before the end of the observation period. The fact that recent papers have had less time to accumulate citations is reflected in the sharp decrease that is noticeable as time approaches the end of the observation period.

## S2. EXAMPLES OF TOP SLEEPING BEAUTIES

Figs. S2 and S3 show the citation history of the top 24 papers in the APS dataset. Table S1 presents the comparison between our results and Redner’s results [8].

Fig. S4 displays the citation history of the top 15 Sleeping Beauties in the WoS dataset showed in Table I of the main text. Tables S2, S3, and S4 present the basic information of the top Sleeping Beauties in Statistics, Mathematics, and Social Sciences and Humanities, respectively. See Figs. S5–S8 for corresponding citation histories.

## S3. CHARACTERIZING DECREASING PATTERNS

This section presents a statistical characterization of how yearly citations of papers decrease after the peak. In summary, for most of the papers the yearly citation rate decreases quickly (possibly exponentially) after its peak. Our analysis focused only papers with positive beauty coefficient  $B$ , for a total of 189,673 (out of 384,649; 49.3%) and 14,689,643 (out of 22,379,244; 65.6%) papers in the APS and WoS dataset, respectively. We further classify every of these papers into two categories depending on whether or not their yearly

citation counts  $c_t$  decreased to half of its maximum during the observation period  $[t_m + 1, T]$  (Figs. S9A-B).

We identify 18,131 (9.56%) papers in the APS whose  $c_t$  have not decreased below  $c_{t_m}/2$ , and 2,094,671 (14.26%) in the WoS dataset. Figs. S9C-D display the histograms of  $T - t_m$ . We observe that a large fraction are recently awakening papers, with about 60% of them getting their maximum yearly citations  $c_{t_m}$  in the last year of the observation periods ( $T - t_m = 0$ ).

For the remaining papers whose yearly citations have decreased below  $c_{t_m}/2$ , we define the paper “half-life”  $t_h$  as the number of years required by  $c_t$  to decrease from  $c_{t_m}$  to  $c_{t_m}/2$ . Figs. S9E-H show the distributions of  $t_h$  across all these papers in the APS (Fig. S9E), papers whose  $B$  values ranked in the top 1% (Fig. S9F), from 1% to 10% (Fig. S9G), and the rest (Fig. S9H). We see that yearly citations of SBs decrease rapidly after the peak regardless of their  $B$  values. These results are confirmed also in the WoS dataset, as shown in Figs. S9I-L.

#### S4. NULL MODELS

To verify that the beauty coefficients cannot be explained by the underlying citation networks or other well-known mechanisms, we compare the citation history of each paper as well as the beauty coefficient distribution with those obtained from some null models. Here we employ two null models on the APS dataset, namely citation network randomization (NR) and the preferential attachment mechanism (PA).

The NR procedure starts from the original citation network and carries out a series of link swapping. The end-point nodes (the papers being cited) of a randomly selected pair of links (citations) are swapped if: (i) the two links do not share source or target node; (ii) there are no multiple links after swapping; and, (iii) the publication year of the cited article is not greater than that of the citing article after swapping. Performing  $Q \cdot E$  switches, where  $E$  is the number of links in the citation network and  $Q$  is set to 50, yields a transformation of the original citation network into a random directed graph. This procedure preserves for each paper its number of references (out degree) and total number of citations (in degree), but destroys the dynamics of yearly citations.

PA considers as initial network the empirical APS citation network from 1893 to 1897

when the first citation occurred; it contains 182 nodes and 1 link. In each following year  $t$  until 2009,  $n_t$  papers are added at the same time, and each paper  $p$  brings  $r_p$  references.  $n_t$  is set to the number of APS papers actually published in year  $t$  and each  $r_p$  corresponds to the number of references of one of the papers in such set. As we progressively add papers to the citation network, the references they contain are addressed to previously published papers chosen with probability proportional to one plus the number of citations those papers already have.

## S5. COARSE TOPICS OF SLEEPING BEAUTIES IN THE APS

Examining the citation relationships between papers with high  $B$  values gives us some coarse topics of Sleeping Beauties. In Fig. S10 we present the citation network of the 100 papers with the highest  $B$  values in the APS dataset. Despite many isolated nodes, we observe some (weakly) connected components. Diving into each component, we find that each one corresponds to one coarse topic. In Fig. S11, for instance, we show the topic of each of the 4 largest components and the citation histories of its constituent papers. Except for Fig. S11(b), we observe that papers belonging to the same group exhibit remarkably similar citation histories. They are awoken in the same year and exhibit similar up- and down-going citation patterns. Fig. S11(a) shows the double exchange mechanism works. This theory was introduced in 1950s and became popular in the 1990s. The second group shown in Fig. S11(b) is about Quantum Mechanics. The central paper (blue line and blue node), which is cited by every other paper in the group, is the famous EPR paradox paper by Einstein, Podolsky, and Rosen. The third group shown in Fig. S11(c) is particularly interesting, as it exhibits complex fluctuations in the citation histories. Finally, the group shown in Fig. S11(d) is about graphite and graphene. The central paper (blue line and blue node) in Fig. S11(d) is a pioneering work on the band structure of graphite, foundation of the discovery of graphene, the subject of the 2010 Nobel Prize in Physics.

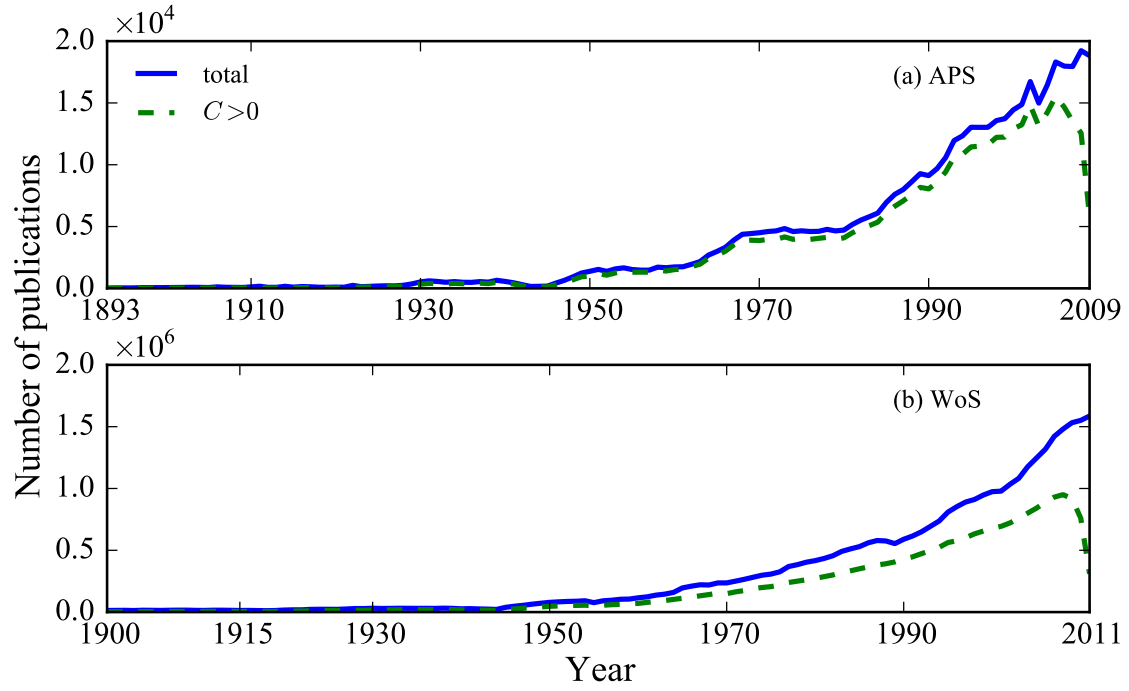

FIG. S1. (Blue solid) Total number of papers per year; (Green dashed) Yearly number of papers that received citations.

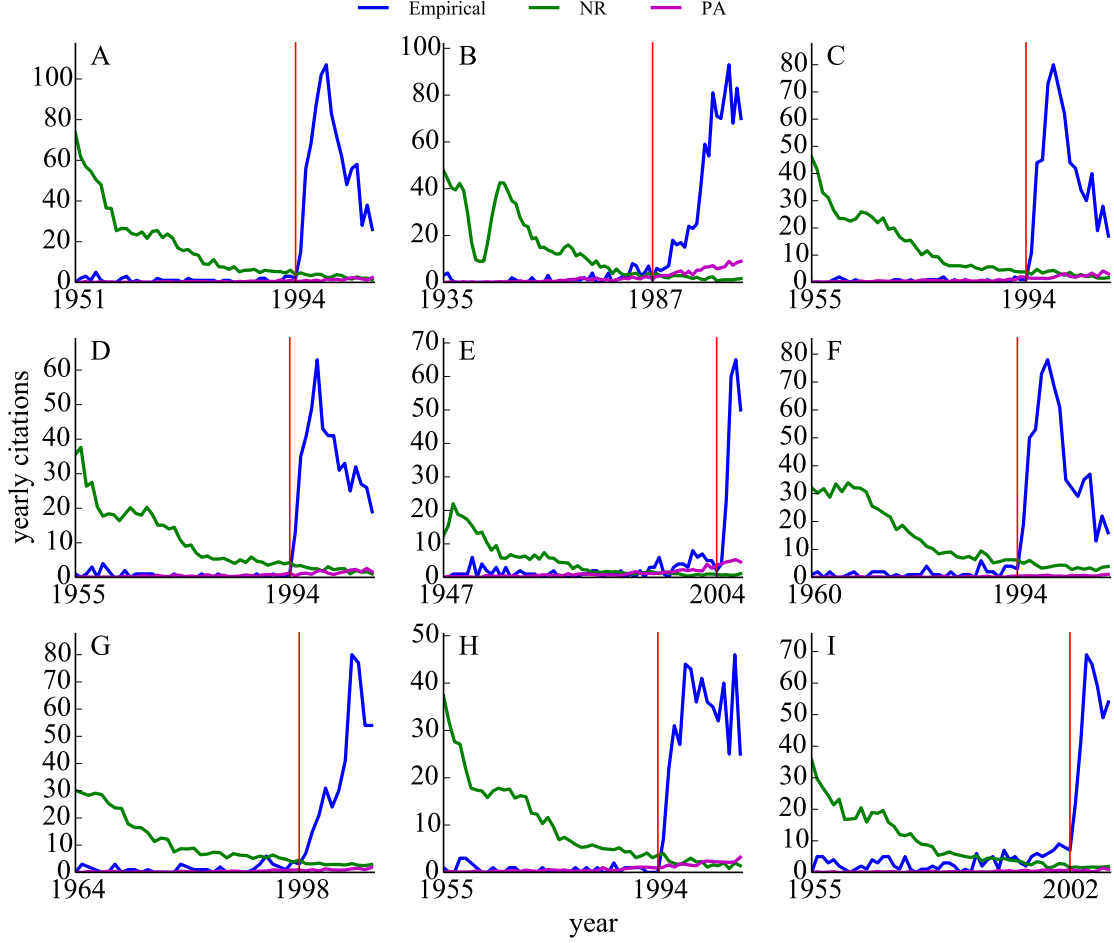

FIG. S2. Top Sleeping Beauties in physics. Blue curves show yearly citations received by papers: (A) Phys. Rev. 82, 403 (1951),  $B = 1,722$  [12]; (B) Phys. Rev. 47, 777 (1935),  $B = 1,419$  [4]; (C) Phys. Rev. 100, 675 (1955),  $B = 1,348$  [1]; (D) Phys. Rev. 100, 545 (1955),  $B = 1,107$  [10]; (E) Phys. Rev. 71, 622 (1947),  $B = 1,086$  [9]; (F) Phys. Rev. 118, 141 (1960),  $B = 841$  [2]; (G) Phys. Rev. 135, A550 (1964),  $B = 825$  [5]; (H) Phys. Rev. 100, 564 (1955),  $B = 670$  [7]; (I) Phys. Rev. 100, 580 (1955),  $B = 624$  [3]. Yearly citations obtained from citation network randomization (NR) and preferential attachment (PA) model are plotted as green and purple lines, respectively. Both the NR and PA results are averaged across 10 realizations. The awakening years, identified using Eq. 3, are indicated by the vertical red lines. The sharp decrease of the curve for the NR result in panel B is probably due to the decrease of number of publications during the period of World War II (Fig. S1a). Panels A, C, D, F, and H refer to papers about the double exchange mechanism. Panel B refers to the EPR paradox paper by Einstein, Podolsky, and Rosen. Panel E considers the pioneering study on the band structure of graphite.

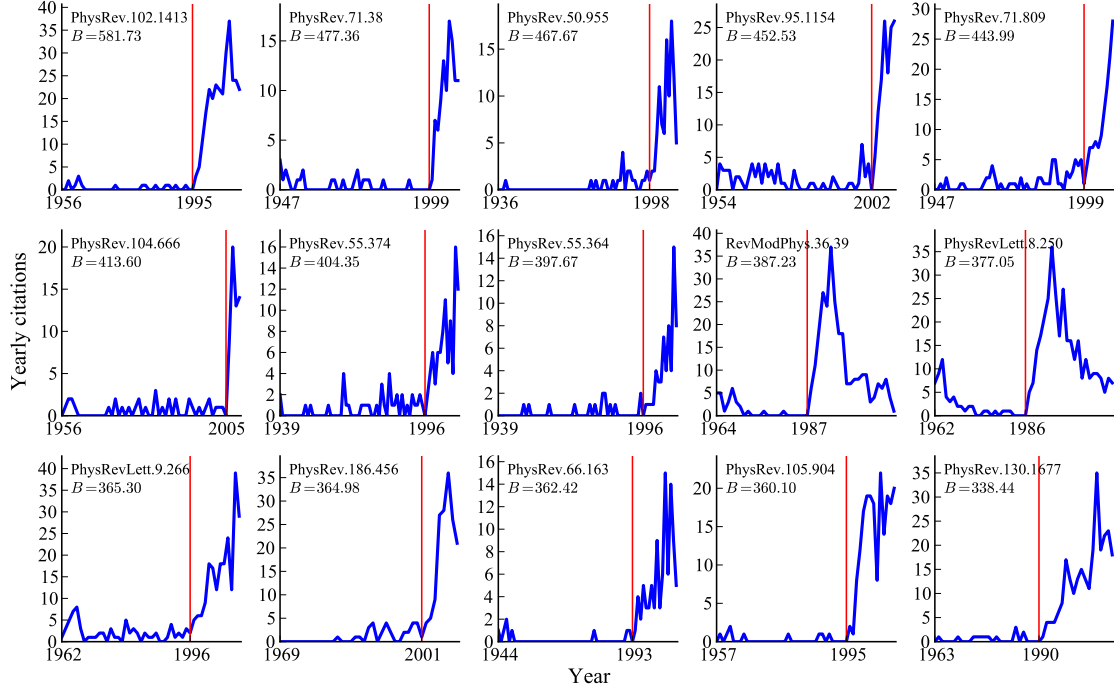

FIG. S3. (Blue) Citation histories, (Red) awakening years, and  $B$  values of the 15 papers ranked from 10<sup>th</sup> to 24<sup>th</sup> based on the  $B$  values in the APS dataset. The ending year is 2009.

| Publication         | Rank | $B$     | Awakening |
|---------------------|------|---------|-----------|
| PR 40, 749 (1932)   | 45   | 250.79  | 1980      |
| PR 46, 1002 (1934)  | 54   | 237.40  | 1975      |
| PR 47, 777 (1935)   | 2    | 1419.15 | 1987      |
| PR 56, 340 (1939)   | 96   | 174.59  | 1987      |
| PR 82, 403 (1951)   | 1    | 1722.25 | 1994      |
| PR 82, 664 (1951)   | 192  | 122.56  | 2007      |
| PR 100, 545 (1955)  | 4    | 1106.82 | 1994      |
| PR 100, 564 (1955)  | 8    | 670.42  | 1994      |
| PR 100, 675 (1955)  | 3    | 1348.26 | 1994      |
| PR 109, 1492 (1958) | 147  | 138.63  | 2004      |
| PR 115, 485 (1959)  | 218  | 115.07  | 2001      |
| PR 118, 141 (1960)  | 6    | 841.47  | 1994      |

TABLE S1. Comparison between our results and Redner’s results [8]. The first column lists the 12 *revived classics* in physics detected by Redner’s analysis and arranged in chronological order. From the second column, we report our results: the rank position according to their beauty coefficient  $B$ , the value of  $B$ , and the awakening year.



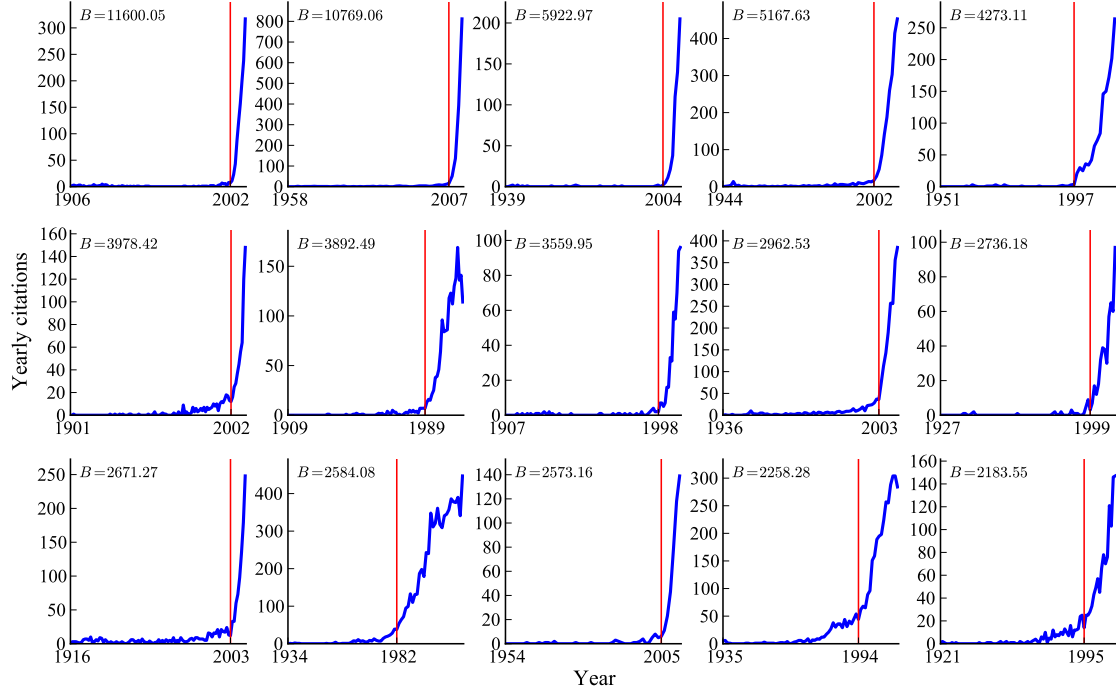

FIG. S4. (Blue) Citation histories, (Red) awakening years, and  $B$  values of the top 15 papers, based on the  $B$  values in the WoS dataset. The ending year is 2011.

| $B$  | Author                  | Title                                                                                    | Pub., awake | Journal                |
|------|-------------------------|------------------------------------------------------------------------------------------|-------------|------------------------|
| 3978 | Pearson, K              | On lines and planes of closest fit to systems of points in space                         | 1901, 2002  | Philos. Mag.           |
| 2736 | Wilson, EB              | Probable inference, the law of succession, and statistical inference                     | 1927, 1999  | J. Am. Statist. Assoc. |
| 1909 | Mann, HB                | Nonparametric tests against trend                                                        | 1945, 2003  | Econometrica           |
| 1893 | Kaplan, EL;<br>Meier, P | Nonparametric estimation from incomplete observations                                    | 1958, 1980  | J. Am. Statist. Assoc. |
| 1760 | Fisher, RA              | On the interpretation of $\chi^2$ from contingency tables,<br>and the calculation of $P$ | 1922, 2006  | J. R. Stat. Soc.       |
| 1247 | Hastings, WK            | Monte-carlo sampling methods using markov chains and<br>their applications               | 1970, 1995  | Biometrika             |
| 1193 | Metropolis, N           | The monte carlo method                                                                   | 1949, 2004  | J. Am. Statist. Assoc. |
| 1124 | Moran, PAP              | Notes on continuous stochastic phenomena                                                 | 1950, 1999  | Biometrika             |
| 1050 | Lorenz, MO              | Methods of measuring the concentration of wealth                                         | 1905, 2005  | J. Am. Statist. Assoc. |
| 985  | Kendall, MG             | A new measure of rank correlation                                                        | 1938, 2004  | Biometrika             |

TABLE S2. Basic information about the top 10 papers in Statistics. See Fig. S5 for their citation histories.

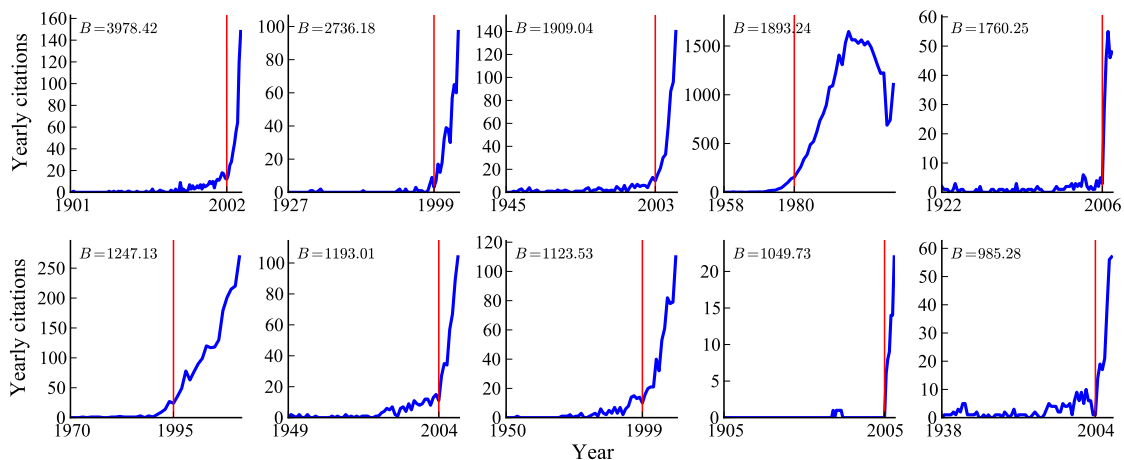

FIG. S5. (Blue) Citation histories, (Red) awakening years, and  $B$  values of top 10 papers in Statistics based on the  $B$  values in the WoS dataset. The ending year is 2011.

| $B$  | Author        | Title                                                                                                                                          | Pub., awake | Journal                |
|------|---------------|------------------------------------------------------------------------------------------------------------------------------------------------|-------------|------------------------|
| 1215 | Wiener, N     | The homogeneous chaos                                                                                                                          | 1938, 2001  | Amer. J. Math.         |
| 1060 | Leray, J      | On the movement of a viscous fluid to fill the space                                                                                           | 1934, 1995  | Acta Math.             |
| 851  | Pringsheim, A | On the theory of the double infinite numerical orders                                                                                          | 1900, 2005  | Math. Ann.             |
| 765  | Jensen, JLWV  | On the convex functions and inequalities between mean values                                                                                   | 1906, 2006  | Acta Math.             |
| 706  | Mann, WR      | Mean value methods in iteration                                                                                                                | 1953, 2004  | Proc. Am. Math. Soc.   |
| 670  | Halpern, B    | Fixed points of nonexpanding maps                                                                                                              | 1967, 2004  | Bull. Amer. Math. Soc. |
| 669  | Haar, A       | On the theory of orthogonal function systems (first announcement)                                                                              | 1910, 1988  | Math. Ann.             |
| 609  | Weyl, H       | The asymptotic dispersal law of eigen values of linear partial equations differential (with an application for the theory of cavity radiation) | 1912, 2002  | Math. Ann.             |
| 578  | Painleve, P   | About second order and higher order differential equations whose general integral is uniform                                                   | 1902, 1990  | Acta Math.             |
| 558  | Schmidt, E    | On the theory of linear and non-linear integral equations chapter i development of random functions in specific systems                        | 1907, 1992  | Math. Ann.             |

TABLE S3. Basic information about the top 10 papers in Mathematics. See Fig. S6 for their citation histories.

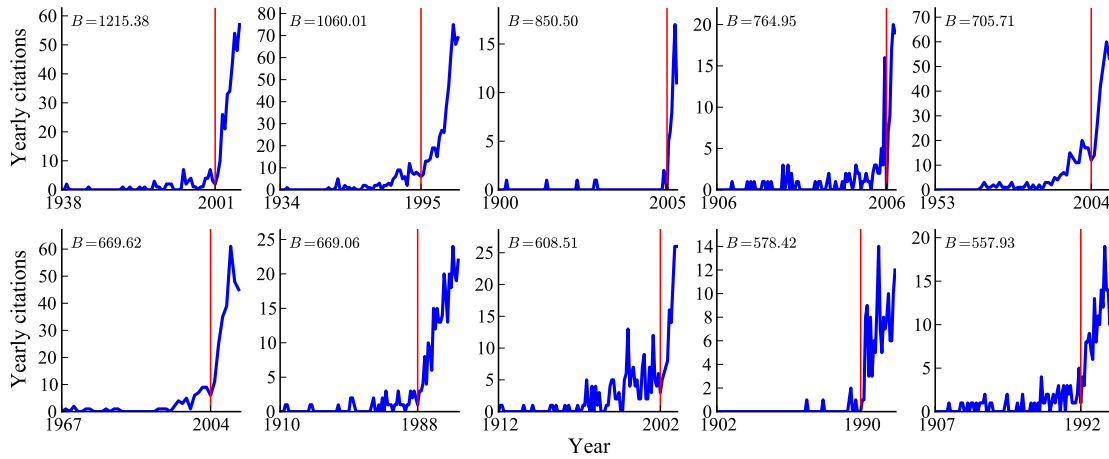

FIG. S6. (Blue) Citation histories, (Red) awakening years, and  $B$  values of top 10 papers in Mathematics based on the  $B$  values in the WoS dataset. The ending year is 2011.

| <i>B</i> | Author                              | Title                                                                                          | Pub., awake | Journal                 |
|----------|-------------------------------------|------------------------------------------------------------------------------------------------|-------------|-------------------------|
| 1901     | Stroop, JR                          | Studies of interference in serial verbal reactions                                             | 1935, 1987  | J. Exp. Psychol.        |
| 1255     | Yerkes, RM;<br>Dodson, JD           | The relation of strength of stimulus to rapidity of habit-formation                            | 1908, 1981  | J. Comp. Neurol.        |
| 584      | Zachary, WW                         | Information flow model for conflict and fission in small groups                                | 1977, 2005  | J. Anthropol. Res.      |
| 563      | Tobler, WR                          | Computer movie simulating urban growth in Detroit region                                       | 1970, 2003  | Econ. Geogr.            |
| 545      | Garfield, E                         | Citation indexes for science - new dimension in documentation through association of ideas     | 1955, 2000  | Science                 |
| 545      | Heider, F;<br>Simmel, M             | An experimental study of apparent behavior                                                     | 1944, 1998  | Am. J. Psychol.         |
| 521      | Watson, JB                          | Psychology as the behaviorist views it                                                         | 1913, 1968  | Psychol. Rev.           |
| 488      | Cohen, J                            | A coefficient of agreement for nominal scales                                                  | 1960, 2009  | Educ. Psychol. Meas.    |
| 485      | Maslow, AH                          | A theory of human motivation                                                                   | 1943, 1998  | Psychol. Rev.           |
| 479      | Glaser, BG                          | The constant comparative method of qualitative analysis                                        | 1965, 2004  | Social Problems         |
| 467      | Todd TW                             | Age changes in the pubic bone                                                                  | 1921, 2003  | Am. J. Phys. Anthropol. |
| 460      | Forrester, JW                       | Industrial dynamics - a major breakthrough for decision makers                                 | 1958, 1993  | HBR                     |
| 453      | Rosenblatt, F                       | Perceptron - a probabilistic model for information storage and organization in the brain       | 1958, 2001  | Psychol. Rev.           |
| 446      | Hotelling, H                        | Analysis of a complex of statistical variables into principal components                       | 1933, 1994  | J. Educ. Psychol.       |
| 428      | Thorndike, EL;<br>Woodworth, RS     | The influence of improvement in one mental function upon the of efficiency other functions (I) | 1901, 1992  | Psychol. Rev.           |
| 424      | Holzinger, KJ;<br>Swineford, F      | The bi-factor method                                                                           | 1937, 2003  | Psychometrika           |
| 405      | Thistlethwaite, DL;<br>Campbell, DT | Regression-discontinuity analysis - an alternative to the ex-post-facto experiment             | 1960, 2005  | J. Educ. Psychol.       |
| 399      | Horn, JL                            | A rationale and test for the number of factors in factor-analysis                              | 1965, 2000  | Psychometrika           |
| 375      | Fisher, I                           | The debt-deflation theory of great depressions                                                 | 1933, 2004  | Econometrica            |
| 369      | Spitzer, HF                         | Studies in retention                                                                           | 1939, 2004  | J. Educ. Psychol.       |
| 368      | Linn, BS;<br>Linn, MW;<br>Gurel, L  | Cumulative illness rating scale                                                                | 1968, 1999  | J Am Geriatr Soc.       |
| 358      | Hull, CL                            | The goal gradient hypothesis and maze learning                                                 | 1932, 2001  | Psychol. Rev.           |
| 356      | Elftman, H;<br>Manter, J            | Chimpanzee and human feet in bipedal walking                                                   | 1935, 2001  | Am. J. Phys. Anthropol. |
| 349      | Fornell, C;<br>Larcker, DF          | Evaluating structural equation models with unobservable variables and measurement error        | 1981, 2004  | J. Marketing Res.       |
| 343      | Armstrong, JS;<br>Overton, TS       | Estimating nonresponse bias in mail surveys                                                    | 1977, 1998  | J. Marketing Res.       |
| 342      | Wechsler, H                         | Toward neutral principles of constitutional-law                                                | 1959, 1986  | Harv. Law Rev.          |
| 324      | Cohen, J                            | Eta-squared and partial eta-squared in fixed factor anova designs                              | 1973, 2005  | Educ. Psychol. Meas.    |
| 324      | Dunlap, K                           | Reactions to rhythmic stimuli, with attempt to synchronize                                     | 1910, 1995  | Psychol. Rev.           |
| 320      | Ellsberg, D                         | Risk, ambiguity, and the savage axioms                                                         | 1961, 2002  | Q. J. Econ.             |
| 320      | Lewin, K                            | Defining the 'field at a given time'                                                           | 1943, 2006  | Psychol. Rev.           |

TABLE S4. Basic information about the Sleeping Beauties in Social Sciences and Humanities among the top 1,000 in the WoS dataset. See Fig. S7 and S8 for their citation histories.

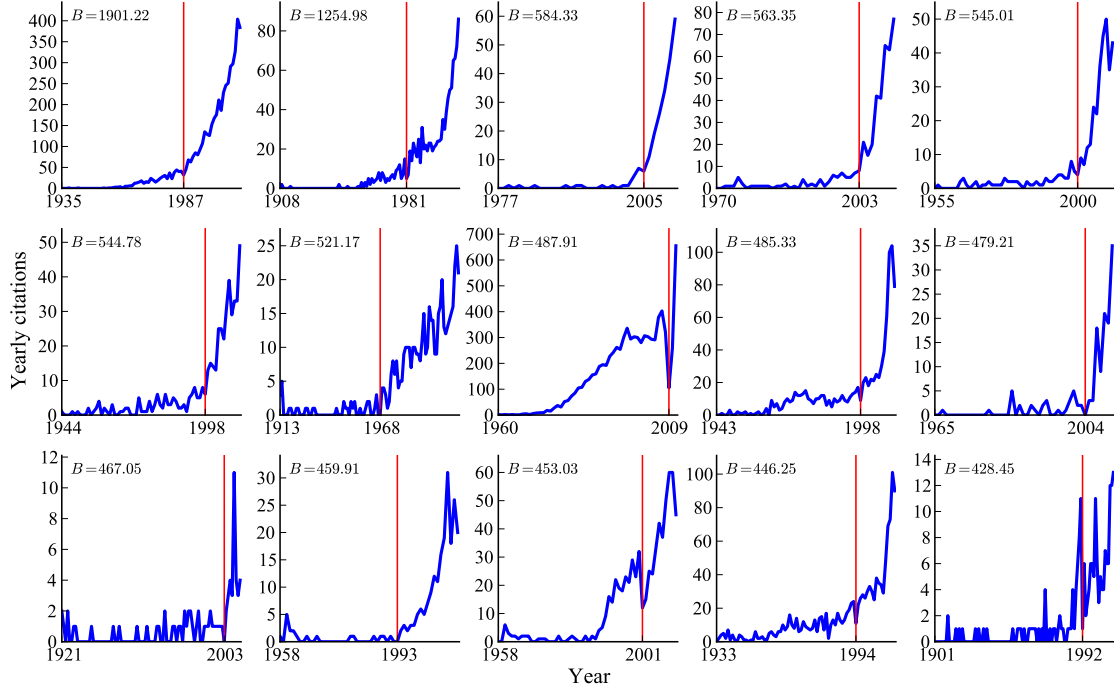

FIG. S7. (Blue) Citation histories, (Red) awakening years, and  $B$  values of top 15 Sleeping Beauties in Social Sciences and Humanities based on the  $B$  values in the WoS dataset. The ending year is 2011.

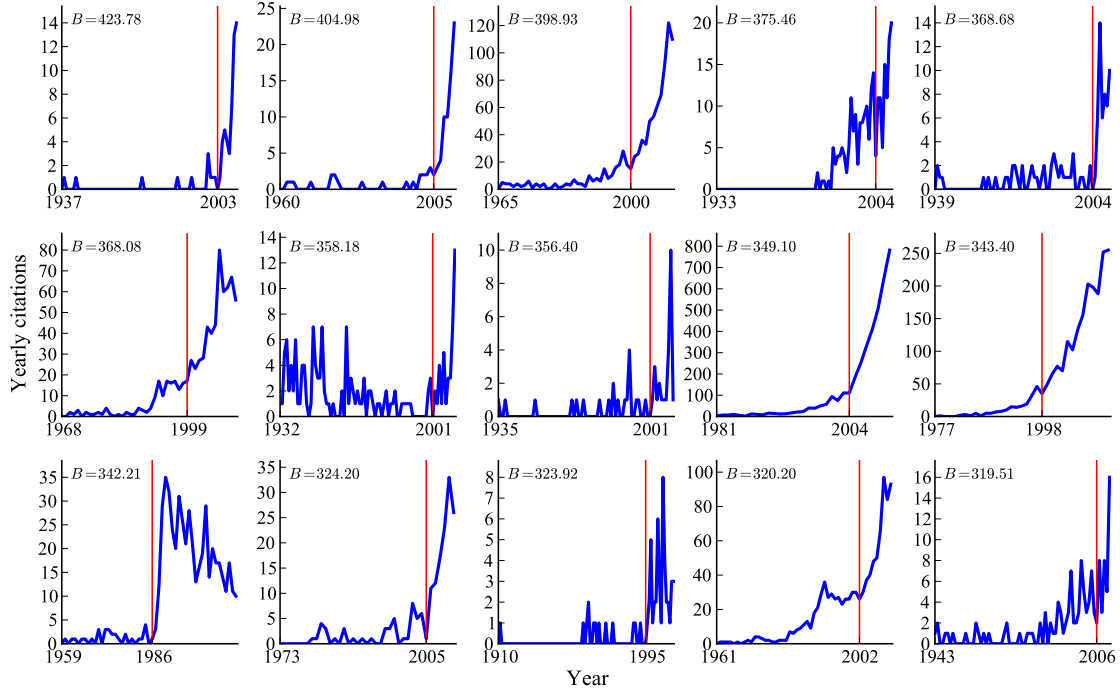

FIG. S8. (Blue) Citation histories, (Red) awakening years, and  $B$  values of 15 Sleeping Beauties ranked from 16<sup>th</sup> to 30<sup>th</sup> in Social Sciences and Humanities based on  $B$  values in the WoS dataset. The ending year is 2011.

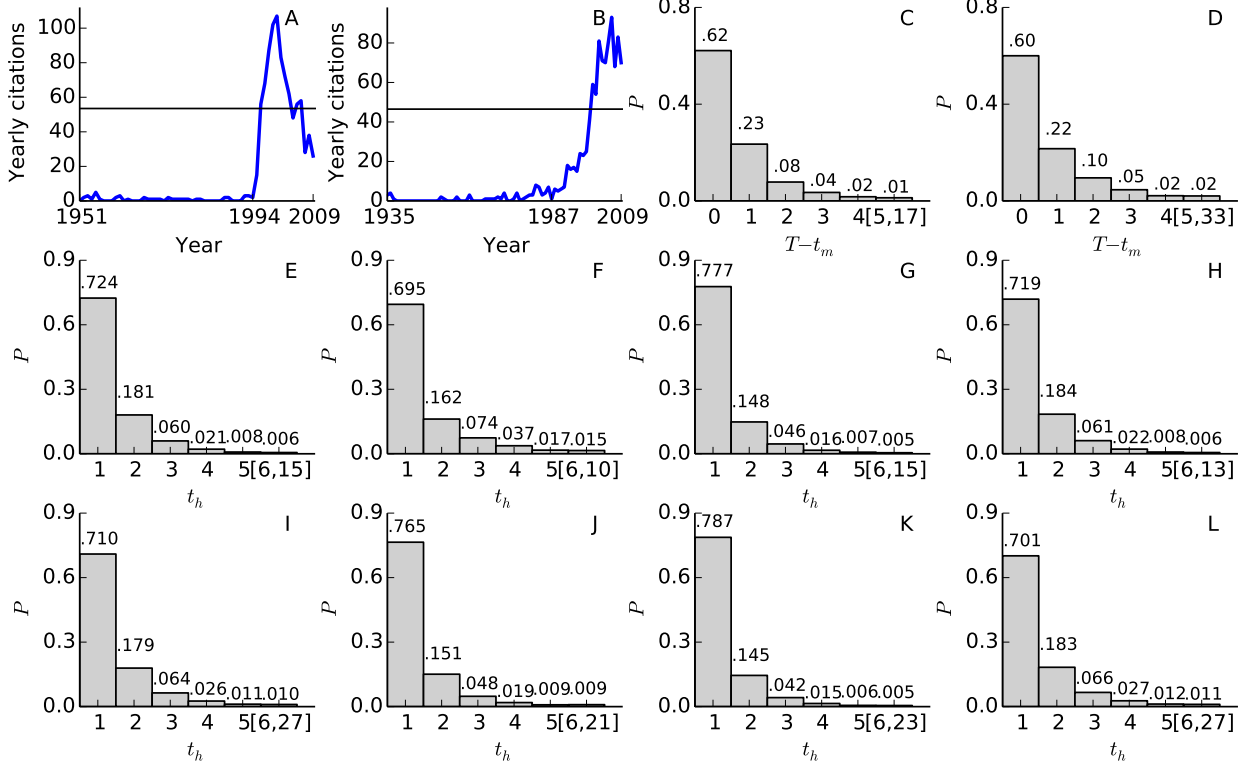

FIG. S9. Characterization of decreasing citation patterns of Sleeping Beauties. (A–B) Papers with positive beauty coefficient  $B$  are classified into two categories depending on whether or not their yearly citation counts have decreased to half of their maximum. (C–D) For papers belonging to the first class, we measure the length  $T - t_m$  of the observation window at our disposal.  $T = 2009$  for the APS and  $T = 2011$  for the WoS are the last year covered by our datasets.  $t_m$  is instead the year when we observe the maximum number of yearly citations accumulated by an individual paper. The figures display the histograms of the quantity  $T - t_m$  obtained for the APS (C) and WoS (D) dataset. (E–H) For papers that have experienced a fall in yearly citation counts at least below the half of their peak height  $c_m$ , we measure  $t_h$ , i.e., the number of years necessary to fall below the line  $c_m/2$ . We show that the distribution of  $t_h$  is insensible to the specific dataset considered, and to their beauty coefficient  $B$ . Panels F, G and H refer to the papers of the APS dataset ranked in the top 1%, top 1% to 10%, below 10%, respectively. Panels I–L show the same histograms as those of panels E–H, but for the WoS dataset.

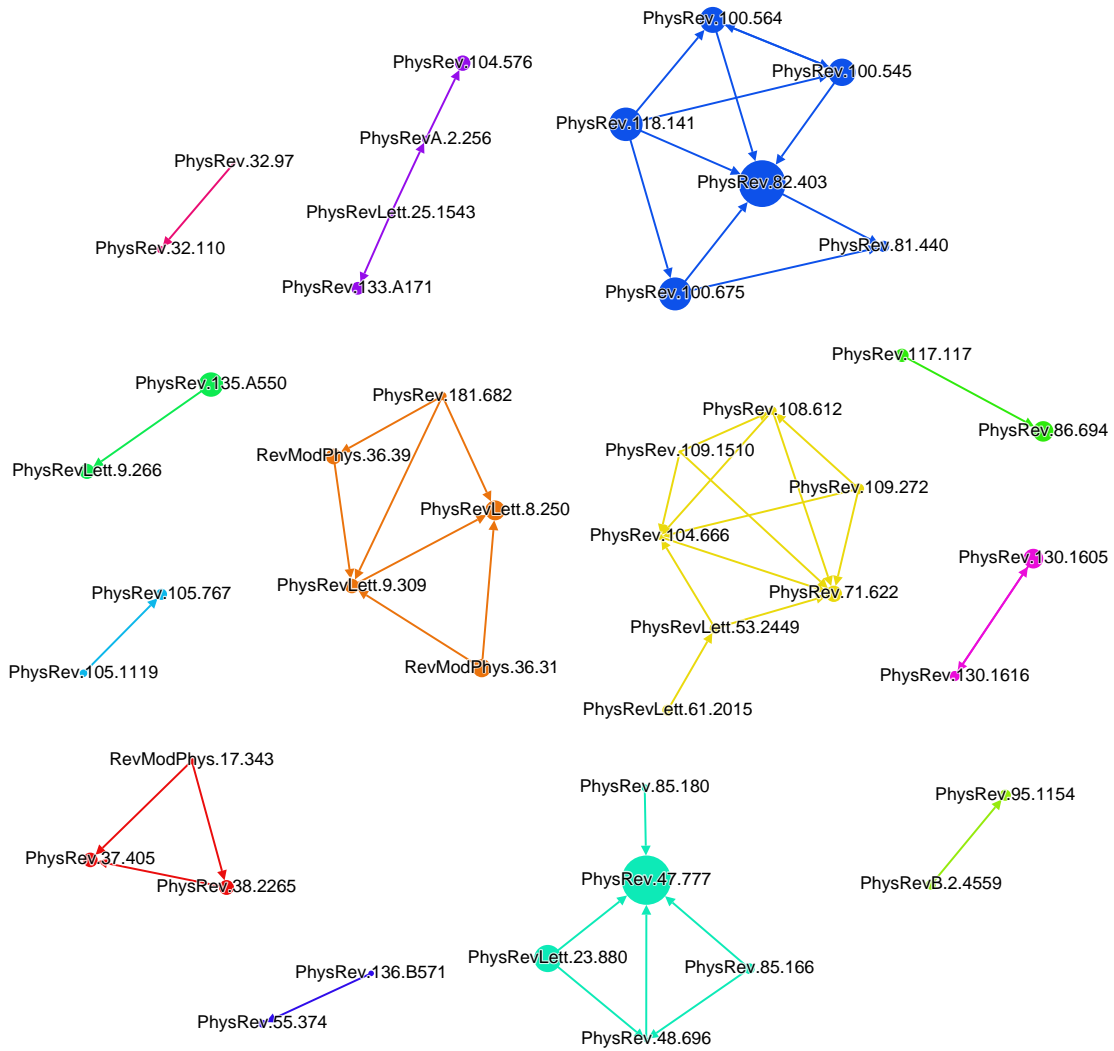

FIG. S10. The citation network of the 100 papers with highest  $B$  values in the APS dataset. Isolated nodes are omitted. The size of a node is based on its total number of citations.



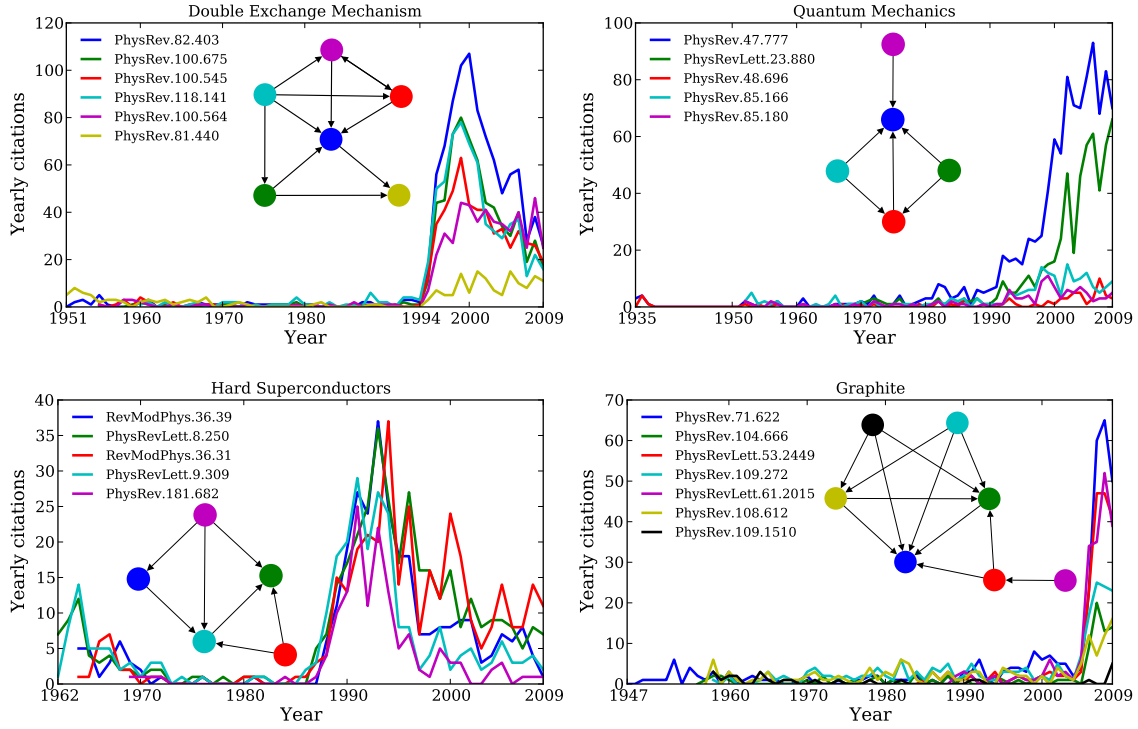

FIG. S11. The citation network reveals coarse topics of Sleeping Beauties. Papers belonging to the same group exhibit similar citation histories.

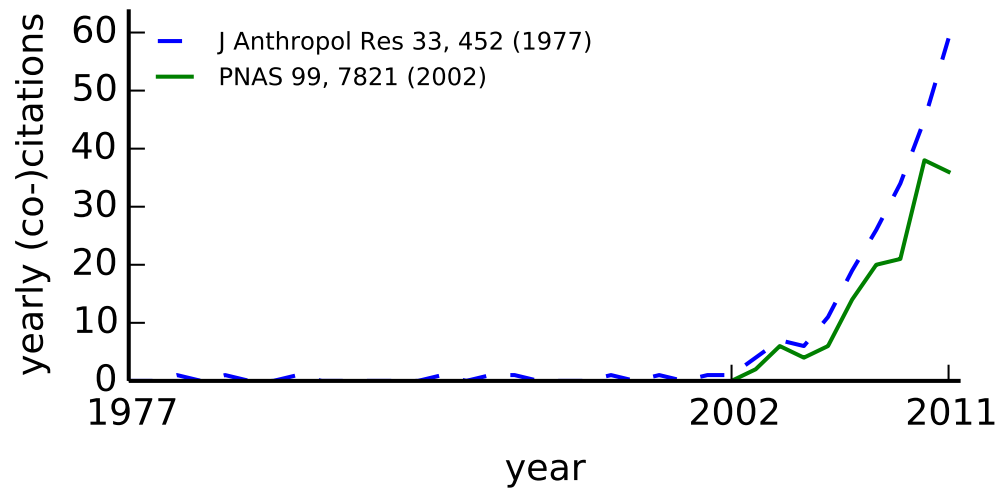

FIG. S12. Citation history of the paper *J. Anthropol. Res.* **33**, 452 (1977) [11]. The most co-cited paper is *PNAS* **99**, 7821 (2002) [6].

| Subject category                      | Range of $B$      |
|---------------------------------------|-------------------|
| physics, multidisciplinary            | [90.56, 5922.97]  |
| chemistry, multidisciplinary          | [90.57, 10769.06] |
| multidisciplinary sciences            | [90.54, 3892.49]  |
| mathematics                           | [90.62, 1215.38]  |
| medicine, general & internal          | [90.58, 1522.30]  |
| physics, applied                      | [90.63, 3978.42]  |
| surgery                               | [90.57, 799.65]   |
| chemistry, inorganic & nuclear        | [90.55, 1333.20]  |
| statistics & probability              | [90.56, 2736.18]  |
| mechanics                             | [90.56, 3978.42]  |
| biology                               | [90.68, 1247.13]  |
| ecology                               | [90.60, 1792.29]  |
| physics, condensed matter             | [90.58, 3978.42]  |
| biochemistry & molecular biology      | [90.62, 839.22]   |
| astronomy & astrophysics              | [90.56, 984.81]   |
| physics, atomic, molecular & chemical | [90.60, 774.23]   |
| neurosciences                         | [90.59, 633.23]   |
| materials science, multidisciplinary  | [90.63, 3978.42]  |
| plant sciences                        | [90.54, 1199.00]  |
| engineering, chemical                 | [90.60, 2962.53]  |

TABLE S5. Threshold of  $B$  for each of the top 20 subject categories producing the top 0.1% SBs in the WoS dataset.

- 
- [1] P. Anderson and H. Hasegawa. Considerations on double exchange. *Phys. Rev.*, 100:675–681, Oct 1955.
- [2] P. de Gennes. Effects of double exchange in magnetic crystals. *Phys. Rev.*, 118:141–154, Apr 1960.
- [3] G. Dresselhaus. Spin-orbit coupling effects in zinc blende structures. *Phys. Rev.*, 100:580–586, Oct 1955.
- [4] A. Einstein, B. Podolsky, and N. Rosen. Can quantum-mechanical description of physical reality be considered complete? *Phys. Rev.*, 47:777–780, May 1935.
- [5] P. Fulde and R. Ferrell. Superconductivity in a strong spin-exchange field. *Phys. Rev.*, 135:A550–A563, Aug 1964.
- [6] M. Girvan and M. E. J. Newman. Community structure in social and biological networks. *Proceedings of the National Academy of Sciences*, 99(12):7821–7826, 2002.
- [7] J. Goodenough. Theory of the role of covalence in the perovskite-type manganites  $[\text{La}, m(\text{II})]\text{MnO}_3$ . *Phys. Rev.*, 100:564–573, Oct 1955.
- [8] S. Redner. Citation statistics from 110 years of physical review. *Physics Today*, 58(6):49–54, 2005.
- [9] P. Wallace. The band theory of graphite. *Phys. Rev.*, 71:622–634, May 1947.
- [10] E. Wollan and W. Koehler. Neutron diffraction study of the magnetic properties of the series of perovskite-type compounds  $[(1-x)\text{La}, x\text{Ca}]\text{MnO}_3$ . *Phys. Rev.*, 100:545–563, Oct 1955.
- [11] W. W. Zachary. An information flow model for conflict and fission in small groups. *Journal of Anthropological Research*, 33(4):452–473, 1977.
- [12] C. Zener. Interaction between the  $d$ -shells in the transition metals. ii. ferromagnetic compounds of manganese with perovskite structure. *Phys. Rev.*, 82:403–405, May 1951.
